# Supplementary figures and images for: Mufangji Decoction and Its Active Ingredient Patchouli Alcohol Inhibit Tumor Growth through Regulating Akt/mTOR-Mediated Autophagy in Nonsmall-Cell Lung Cancer
Source: Hindawi journal article supplement (doi:10.1155/2021/2373865), 2021-11-02

Figure S1

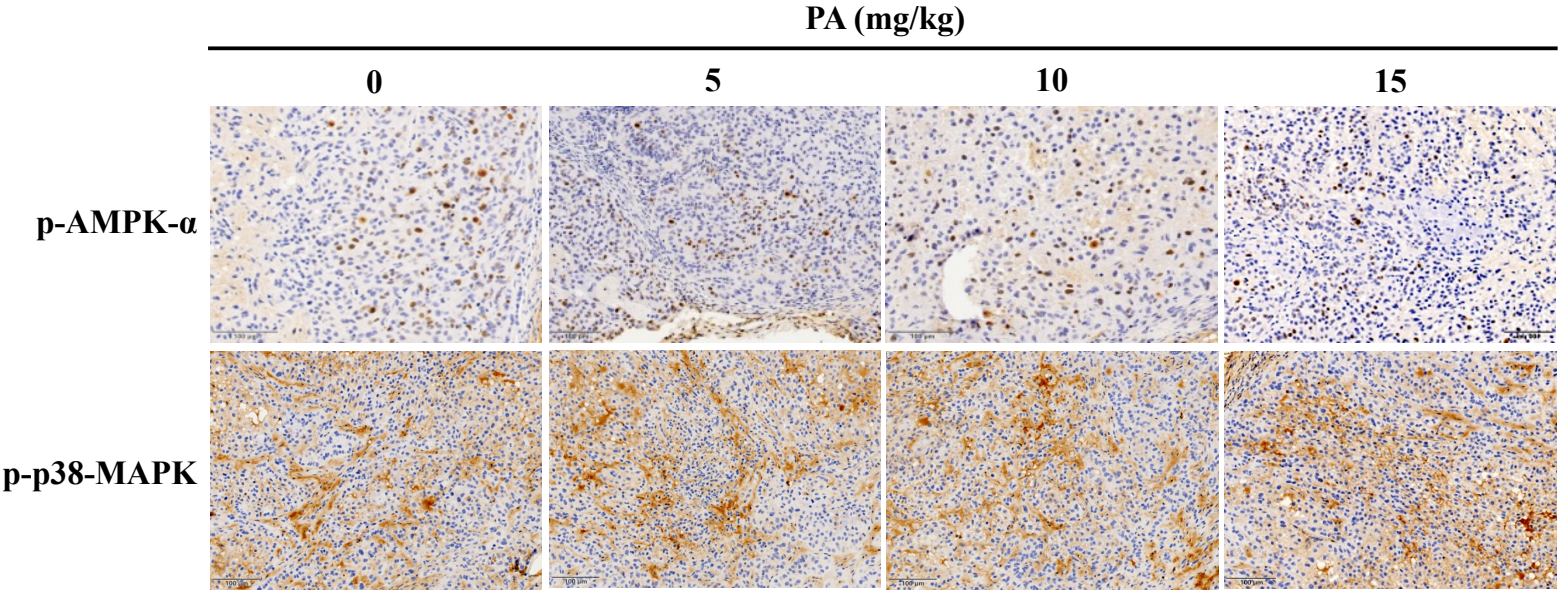

Supplement: f1 [file 2373865.f1.zip]
